# Supplementary material
Source: HighWire-hosted journal article supplement (https://bmjopen.bmj.com/content/11/8/e049676)
Supplement: inline-supplementary-material-2 [file inline-supplementary-material-2.pdf]

**Appendix 2: Opioid oral morphine milligram equivalent conversion table**

|                                               | <b>Conversion factor</b> | <b>Dose Equivalent Morphine Sulphate (30 mg)</b> |
|-----------------------------------------------|--------------------------|--------------------------------------------------|
| <b>Morphine</b>                               |                          |                                                  |
| Oral (= rectal)                               | 1                        | 30 mg                                            |
| Intravenous                                   | 3                        | 10 mg                                            |
| Epidural                                      | 30                       | 1 mg                                             |
| Intrathecal                                   | 300                      | 0,1 mg                                           |
| Oxycodone                                     | 1.5                      | 20 mg                                            |
| Codeine                                       | 0.15                     | 200 mg                                           |
| Tramadol                                      | 0.2                      | 150 mg                                           |
| <b>Fentanyl</b>                               |                          |                                                  |
| Transdermal                                   | 2.4                      | 12.5 mcg/hour                                    |
| Intravenous                                   | 300                      | 0,1 mg                                           |
| Sublingual                                    | 0.13                     | 230 mcg                                          |
| Nasal                                         | 0.16                     | 190 mcg                                          |
| <b>Remifentanyl</b> (intravenous)             | 300                      | 0.1mg (= 100 mcg)                                |
| <b>Sufentanyl</b> (intravenous)               | 3000                     | 0.01 mg (= 10 mcg)                               |
| <b>Buprenorphine</b>                          |                          |                                                  |
| Sublingual                                    | 0.05                     | 600 mcg                                          |
| Transdermal                                   | 2.3                      | 13 mcg/hour                                      |
| Intravenous                                   | 75                       | 0.4 mg                                           |
| <b>Hydromorphone</b>                          |                          |                                                  |
| Oral                                          | 4                        | 7.5 mg                                           |
| Intravenous                                   | 8                        | 3.75 mg                                          |
| <b>Piritramide</b> (dipidolor)<br>intravenous | 2                        | 15 mg                                            |
| <b>Tapentadol</b>                             |                          |                                                  |
| Oral                                          | 0.4                      | 7.5                                              |
| <b>Methadone</b>                              |                          |                                                  |
| Oral 0-20 mg                                  | 4                        | 7.5 mg                                           |
| 21-50 mg                                      | 8                        | 3.75 mg                                          |
| >51 mg                                        | 10                       | 3 mg                                             |
| Intravenous                                   | 3                        | 10 mg                                            |
| <b>Pethidine</b>                              |                          |                                                  |
| Intramuscular/subcutaneous                    | 0.3                      | 100 mg                                           |
