# Supplementary material
Source: HighWire-hosted journal article supplement (https://bmjopen.bmj.com/content/11/8/e049676)
Supplement: inline-supplementary-material-4 [file inline-supplementary-material-4.pdf]

## Checklist Transitional Pain Service (TPS)

### Multidisciplinary meeting (preoperative)

#### Patient data

|                                            |  |
|--------------------------------------------|--|
| Patient number                             |  |
| Type of surgery                            |  |
| Date of preoperative screening             |  |
| Date of surgery                            |  |
| Date of Multidisciplinary Team Meeting TPS |  |

#### Pre-existent pain medication

#### Intraoperative phase

##### *Anesthetic*

General

Local

##### *Multimodal pain management*

##### Intravenous medication

##### Regional techniques

##### Local techniques

#### Postoperative phase

##### *Pharmacological pain management, algorithm 1*

##### *Non-pharmacological*

If necessary, referral to psychologist, social worker or physiotherapist

## Checklist Transitional Pain Service (TPS)

### Additional information about this patient/treatment

#### Checkboxes:

- After the multidisciplinary meeting one of the members of the TPS group will call the patient and explain the intraoperative multimodal pain treatment (informed consent and psychoeducation)
- One of the members sends the information folder towards the address

### Checklist postoperative period

---

#### APS or CPS

- Is there adequate pain control?

*If not, supervision about treatment by TPS anesthetist\**

- Cease medication that is deemed unnecessary (taper opioids)
- Give adequate education about the individual multimodal pain management plan and the process of weaning from opioids

---

#### TPS member

- Contact surgeon; propose and discuss discharge pain medication, *algorithm 2*
- Discusses post discharge medication with the patient
- Contact general practitioner; inform about the study

## Checklist Transitional Pain Service (TPS)

### Checklist post-discharge period

After discharge, follow up occurs:

- After three months and after six months for every patient, or extra;

For a patient that is not completely weaned of pain medication or still experiences pain in the surgical area (until adequate pain control is achieved and medication is weaned of):

- For the first two months: every two weeks
- For the last four months: every four weeks

\* The definition of follow-up is a telephone call or an appointment at the outpatient clinic.

### TPS member

|                       | Pain in surgical area | Use of pain medication | Opioids and dose in MME? | Other pain med? | Switch? Tapering? Referral? | Healthcare consumption? |
|-----------------------|-----------------------|------------------------|--------------------------|-----------------|-----------------------------|-------------------------|
| 15 <sup>th</sup> day  |                       |                        |                          |                 |                             |                         |
| 30 <sup>th</sup> day  |                       |                        |                          |                 |                             |                         |
| 45 <sup>th</sup> day  |                       |                        |                          |                 |                             |                         |
| 60 <sup>th</sup> day  |                       |                        |                          |                 |                             |                         |
| 90 <sup>th</sup> day  |                       |                        |                          |                 |                             |                         |
| 120 <sup>th</sup> day |                       |                        |                          |                 |                             |                         |
| 150 <sup>th</sup> day |                       |                        |                          |                 |                             |                         |
| 180 <sup>th</sup> day |                       |                        |                          |                 |                             |                         |

- At day 90<sup>th</sup> day remember patient of questionnaires
- At 180<sup>th</sup> day remember patient of questionnaires
- If CPSP developed after six months > referral to chronic pain specialist

### Additional information about this patient/treatment

## Checklist Transitional Pain Service (TPS)

### Appendix

#### Algorithm 1: pharmacological multimodal postoperative pain management

1. Paracetamol + NSAID (preferably metamizole)
2. Regional analgesia (epidural or peripheral nerve block)
3. Continuous Wound infiltration or Continuous surgical site analgesia
4. Adjuvants
  - a. NMDA antagonist (S-ketamine)
  - b. Alfa2 agonist (clonidine)
5. Opioids
  - a. Oral administered
  - b. Transdermal, nasal, sublingual
  - c. Patient controlled analgesia (PCA) infusion pump (morphine, buprenorphine, piritramide).

#### Algorithm 2: Out of hospital pharmacological pain management

1. Paracetamol + NSAID
2. Medication for neuropathic pain
  - a. Anticonvulsants (pregabalin)
  - b. Tricyclic antidepressant (amitriptyline)
3. Tapering opioids
4. Opioid substitute therapy
  - a. Methadone
  - b. Buprenorphine
